# Supplementary material for: Application of biodegradable cholinium ionic liquids for the extraction of 5-hydroxymethylfurfural (HMF) from honey
Source: Royal Society of Chemistry journal article supplement (doi:10.1039/d3ra06077b), 2023-01-01

**Supplementary material for:**

# **Application of biodegradable cholinium ionic liquids for the extraction of 5-hydroxymethylfurfural (HMF) from honey**

Aleksandar Marić<sup>a\*</sup>, Pavle Jovanov<sup>a</sup>, Slobodan Gadžurić<sup>b</sup>, Tatjana Trtić-Petrović<sup>c</sup>, Marijana Sakač<sup>a</sup>, Aleksandar Tot<sup>d</sup>, Marko Bertić<sup>e</sup>, Milan Vraneš<sup>b</sup>

*<sup>a</sup>Institute of Food Technology in Novi Sad, University of Novi Sad, Bulevar cara Lazara 1,  
21000 Novi Sad, Republic of Serbia*

*<sup>b</sup>Faculty of Sciences, University of Novi Sad, Department of Chemistry, Biochemistry and Environmental  
Protection, Trg Dositeja Obradovića 3, 21000 Novi Sad, Republic of Serbia*

*<sup>c</sup>Laboratory of Physics, Vinča Institute of Nuclear Sciences, University of Belgrade, National Institute of  
the Republic of Serbia, 11001 Belgrade, Republic of Serbia*

*<sup>d</sup>Applied Physical Chemistry, Department of Chemistry, KTH Royal Institute of Technology, Stockholm,  
SE-10044, Sweden*

*<sup>e</sup>University of Freiburg, Fahrenbergplatz, 79085 Freiburg im Breisgau, Germany*

**\*Corresponding author:**

**Aleksandar Marić**

Tel. +381 21 485 3812;

Bulevar cara Lazara 1, 21000 Novi Sad, Republic of Serbia;

E-mail: [aleksandar.maric@fins.uns.ac.rs](mailto:aleksandar.maric@fins.uns.ac.rs)

**Table S1.** Experimental binodal mass fraction data for system {IL (Y) + K<sub>3</sub>PO<sub>4</sub> (X) + 20% v/v honey solution} at 296.15 K and at  $p = 0.1$  MPa.

| [Ch][Cl] |       | [Ch][Prop] |       | [Ch][Nic] |       | [Ch][But] |       |
|----------|-------|------------|-------|-----------|-------|-----------|-------|
| 100Y     | 100X  | 100Y       | 100X  | 100Y      | 100X  | 100Y      | 100X  |
| 64.41    | 4.07  | 59.90      | 5.86  | 47.10     | 12.09 | 61.90     | 5.04  |
| 41.86    | 9.31  | 43.13      | 7.60  | 42.71     | 13.78 | 39.25     | 9.90  |
| 36.12    | 13.52 | 34.65      | 10.49 | 38.00     | 16.28 | 36.54     | 11.47 |
| 29.49    | 18.54 | 26.05      | 18.19 | 33.34     | 19.38 | 33.35     | 13.63 |
| 22.79    | 24.73 | 20.77      | 23.14 | 30.86     | 20.94 | 31.34     | 15.04 |
| 20.58    | 26.87 | 15.68      | 28.51 | 27.65     | 23.19 | 29.88     | 16.07 |
| 18.47    | 28.90 | 12.33      | 32.25 | 24.79     | 25.17 | 28.03     | 17.79 |
| 15.08    | 32.69 | 10.21      | 34.66 | 23.21     | 26.40 | 26.36     | 19.11 |
| 12.83    | 35.12 | 8.50       | 36.84 | 21.90     | 27.14 | 24.95     | 20.30 |
| 10.73    | 37.50 | 7.13       | 38.71 | 19.93     | 28.70 | 23.65     | 21.40 |
| 7.98     | 41.42 | 6.16       | 40.23 | 19.13     | 29.25 | 21.32     | 23.42 |
|          |       | 5.12       | 42.08 | 17.41     | 30.52 | 19.27     | 25.41 |
|          |       | 4.28       | 43.64 | 15.63     | 32.00 | 18.07     | 26.82 |
|          |       |            |       | 14.43     | 32.88 | 16.96     | 27.88 |
|          |       |            |       | 13.16     | 34.01 | 16.09     | 28.56 |
|          |       |            |       | 12.17     | 34.88 | 15.19     | 29.43 |
|          |       |            |       | 11.14     | 35.81 | 14.44     | 30.32 |
|          |       |            |       | 10.35     | 36.56 | 13.75     | 30.99 |
|          |       |            |       | 9.42      | 37.47 | 13.23     | 31.54 |
|          |       |            |       | 8.73      | 38.21 | 12.62     | 32.17 |
|          |       |            |       |           |       | 12.03     | 32.75 |
|          |       |            |       |           |       | 11.64     | 33.19 |
|          |       |            |       |           |       | 11.26     | 33.58 |
|          |       |            |       |           |       | 10.91     | 33.88 |
|          |       |            |       |           |       | 10.44     | 34.42 |
|          |       |            |       |           |       | 10.07     | 34.82 |
|          |       |            |       |           |       | 9.75      | 35.19 |
|          |       |            |       |           |       | 9.41      | 35.57 |
|          |       |            |       |           |       | 8.97      | 36.12 |
|          |       |            |       |           |       | 8.38      | 36.84 |
|          |       |            |       |           |       | 7.79      | 37.70 |

**Table S2.** Corelation parameters of Merchuk equation with standard deviation for the IL + K<sub>3</sub>PO<sub>4</sub> + 20% v/v honey solution.

| IL         | A ± σ         | B ± σ          | C ± σ                                         | R <sup>2</sup> |
|------------|---------------|----------------|-----------------------------------------------|----------------|
| [Ch][Cl]   | 121.35 ± 6.64 | -0.32 ± 0.019  | (7.27 ± 2.01) 10 <sup>-6</sup>                | 0.994          |
| [Ch][Prop] | 151.7 ± 25.56 | -0.42 ± 0.058  | (6.54 ± 4.72) 10 <sup>-6</sup>                | 0.978          |
| [Ch][Nic]  | 111.79 ± 4.09 | -0.24 ± 0.01   | 1.82 10 <sup>-5</sup> ± 6.21 10 <sup>-7</sup> | 0.999          |
| [Ch][But]  | 83.00 ± 1.36  | -0.23 ± 0.0045 | 1.69 10 <sup>-5</sup> ± 3.07 10 <sup>-7</sup> | 1              |

**Figure S1a–c.** IR spectra of the synthesized ionic liquids

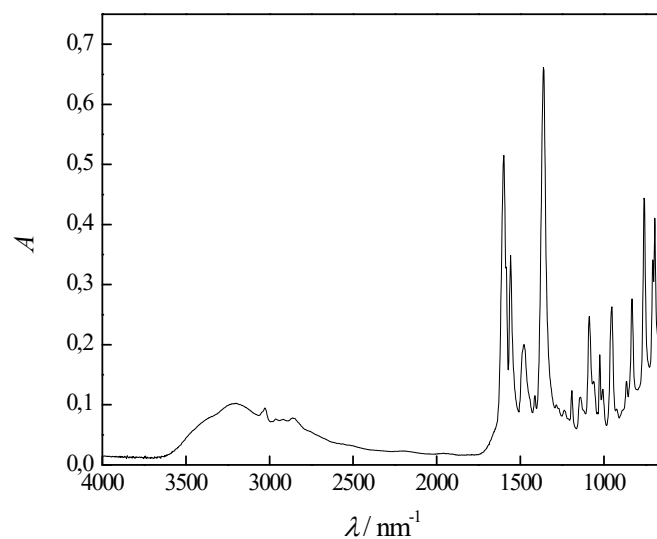

a) IR spectrum [Ch][Nic]

3201 (stretching of the OH group); 1598 (stretching C=C); 1558 (asymmetric stretching of NH); 1478 (CH<sub>3</sub> "zig-zag" vibration); 1361 (symmetric stretching of C=O from COO<sup>-</sup>); 1192 (C-OH stretching); 1088 (stretching C-C-N); 953 (asymmetric C-C-O stretching); 832 (C-C stretching); 759, 708 and 696 (C-H out-of-plane bending).

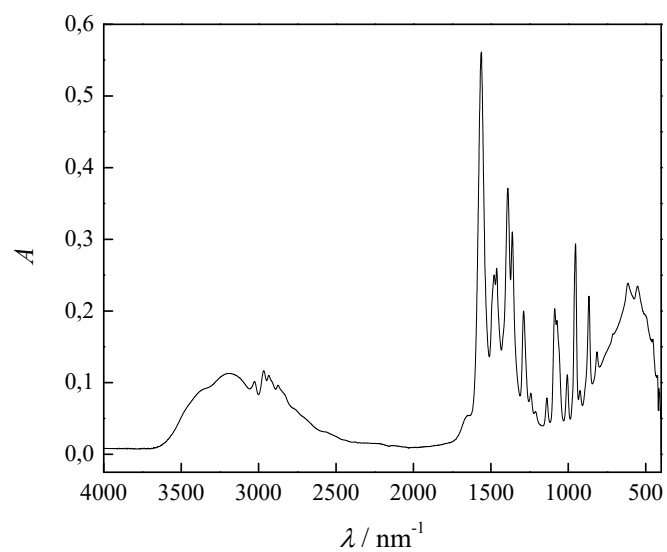

b) IR spectrum [Ch][Prop]

3190 (stretching of the OH group); 2966 (symmetric stretching of N-CH<sub>3</sub>); 1560 (asymmetric stretching of NH); 1462 (CH<sub>3</sub> "zig-zag" vibration); 1390 (symmetric stretch COO<sup>-</sup>); 1361 (symmetric stretching of C=O from COO<sup>-</sup>); 1288 (C-O stretch); 1087 (stretching C-C-N); 953 (asymmetric C-C-O stretching); 866 (C-C stretching); 614 (N-CH<sub>3</sub> stretching).

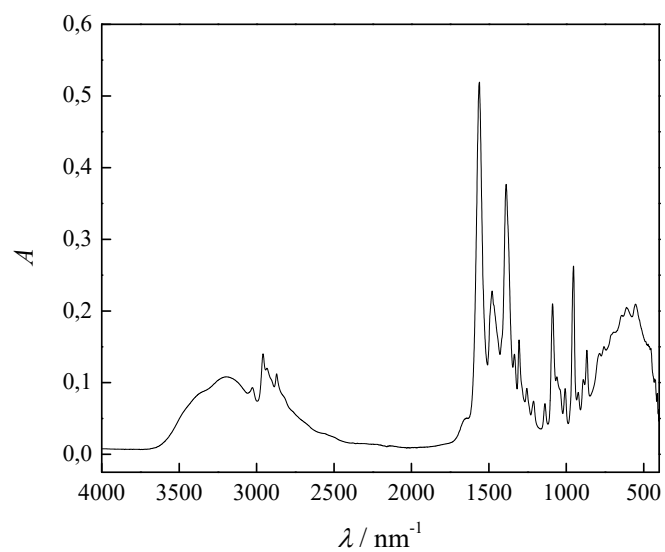

c) IR spectrum [Ch][But]

3192 (stretching of the OH group); 2958 (symmetric stretching of N-CH<sub>3</sub>); 1560 (asymmetric stretching of NH); 1479 (CH<sub>3</sub> "zig-zag" vibration); 1388 (symmetric stretch COO<sup>-</sup>); 1334 (symmetric stretching of C=O from COO<sup>-</sup>); 1305 (C-O stretch); 1088 (stretching C-C-N); 953 (asymmetric C-C-O stretching); 867 (C-C stretching); 553 (N-CH<sub>3</sub> stretching).

**Figure S2.** Binodal curves of the investigated ABS {IL + K<sub>3</sub>PO<sub>4</sub> + H<sub>2</sub>O} at 25 °C and standard atmospheric pressure with labeled ABS composition used in the extraction studies.

Legend: ● [Ch][Prop], ● [Ch][But], ● [Ch][Nic] and ● [Ch][Cl]

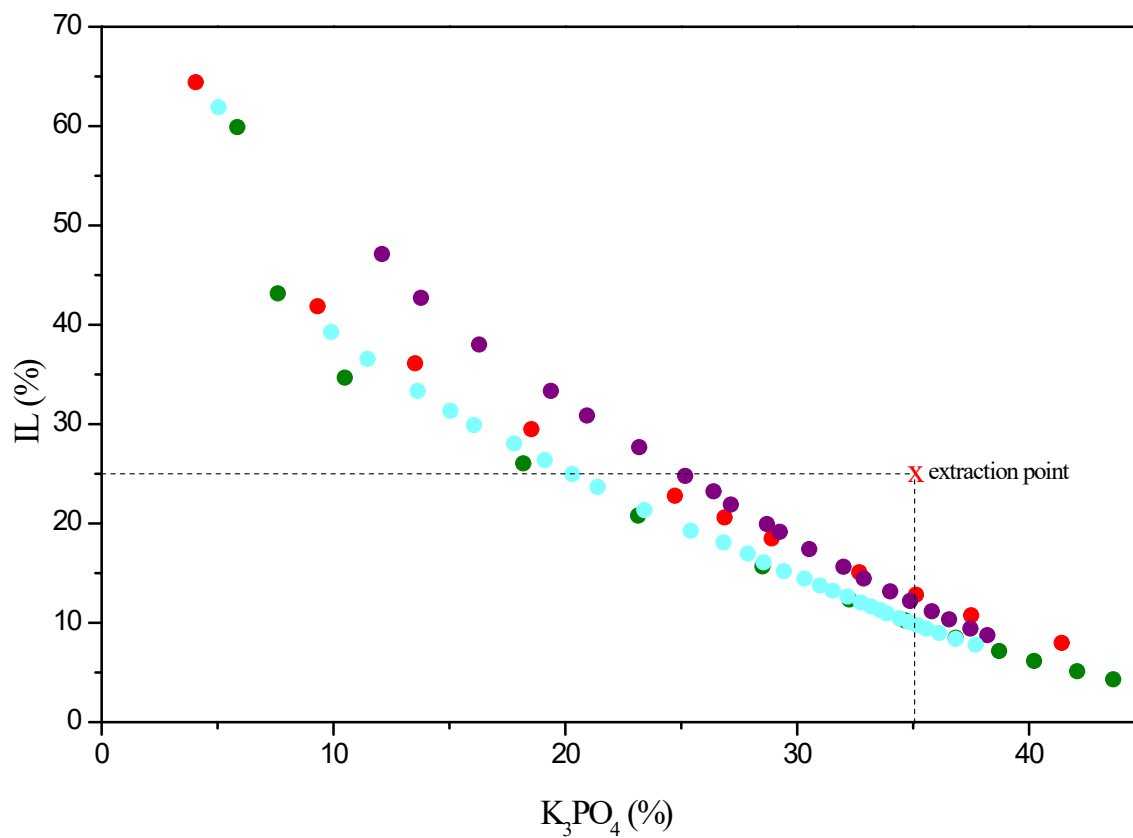

Figure S3. Methodology flowchart

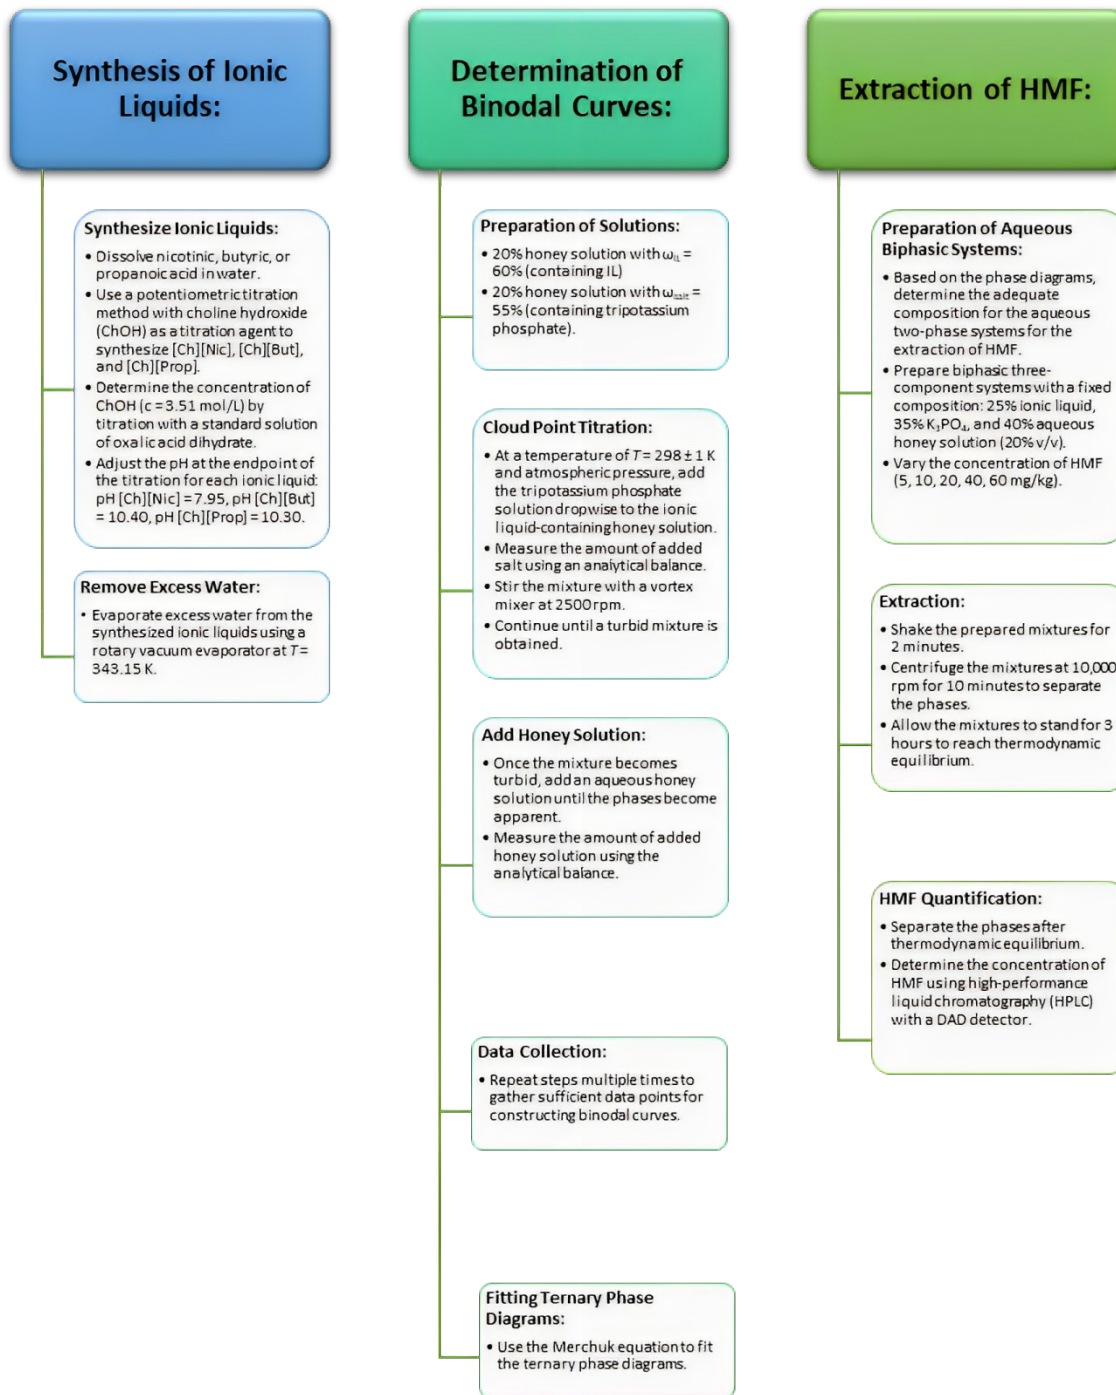

Supplement: d3ra06077b1.pdf [file d3ra06077b1.pdf]
